# Supplementary material
Source: PubMed Central journal article supplement (PMC3562696)
Supplement: NIHMS281791-supplement-1_si_001.pdf [file NIHMS281791-supplement-1_si_001.pdf]

# Measuring deuterium enrichment of glucose hydrogen atoms by gas chromatography mass spectrometry

*Maciek R. Antoniewicz<sup>1</sup>, Joanne K. Kelleher and Gregory Stephanopoulos<sup>\*</sup>*

Department of Chemical Engineering, Bioinformatics and Metabolic Engineering Laboratory,  
Massachusetts Institute of Technology, Cambridge MA 02139, USA.

<sup>\*</sup> To whom correspondence should be addressed. Email: gregstep@mit.edu, Tel.: 617-253-4583, Fax.: 617-253-3122.

<sup>1</sup> Current address: Department of Chemical Engineering, University of Delaware, Newark, DE 19716

This document contains the following information in support of the primary article:

Figure S-1. Schematic overview of the two step procedure for preparation of glucose derivatives.

Figure S-2. Electron impact mass spectra of the 18 prepared glucose derivatives.

Table S-3. List of most abundant fragments for each glucose derivative that were evaluated.

Table S-4. Mass isotopomer distributions for deuterated glucose standards.

Table S-5. Mass isotopomer distributions for mixtures of [2-<sup>2</sup>H]-, [5-<sup>2</sup>H]glucose and natural glucose.

S-6. Calculation of positional deuterium enrichments using least-squares regression.

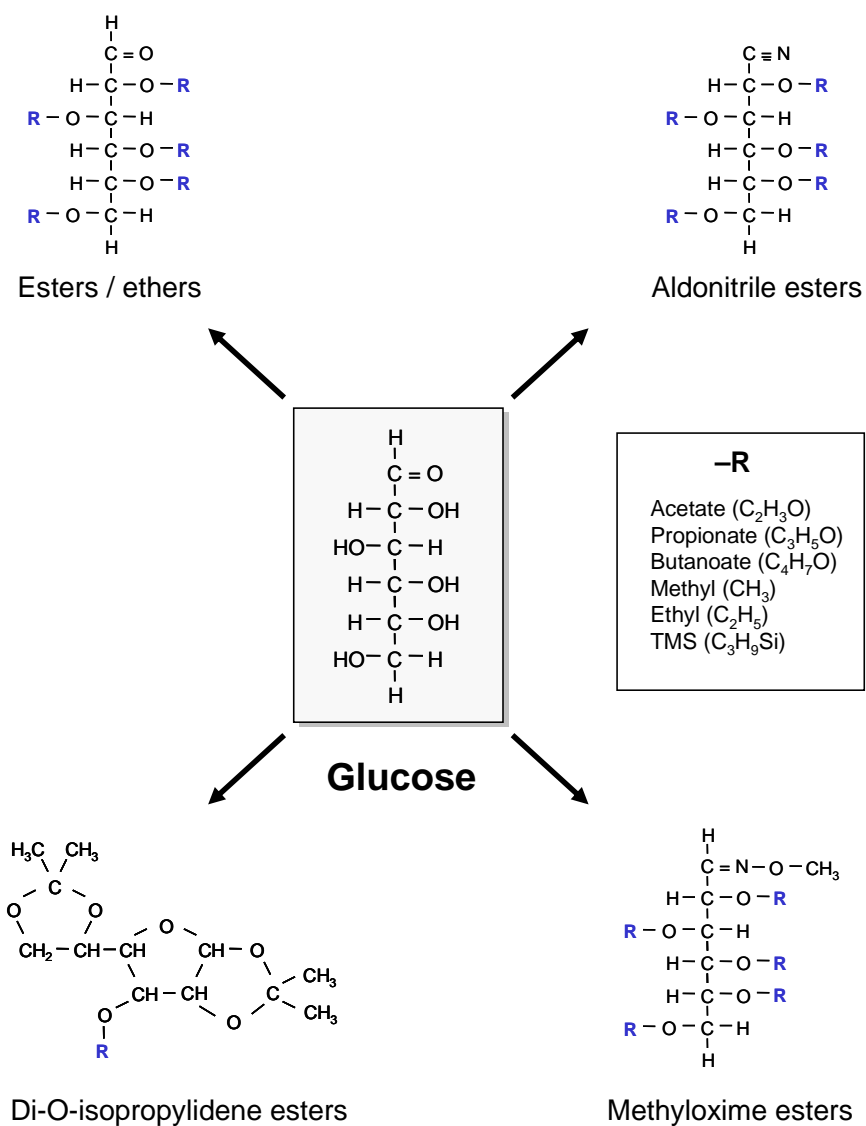

**Figure S-1.** Schematic overview of the two step procedure for preparation of glucose derivatives. In the first reaction step the carbonyl group at C1 of glucose may be derivatized, and in the second reaction step hydroxyl groups of glucose are derivatized. Based on this procedure 18 different glucose derivatives were prepared and analyzed by GC/MS.

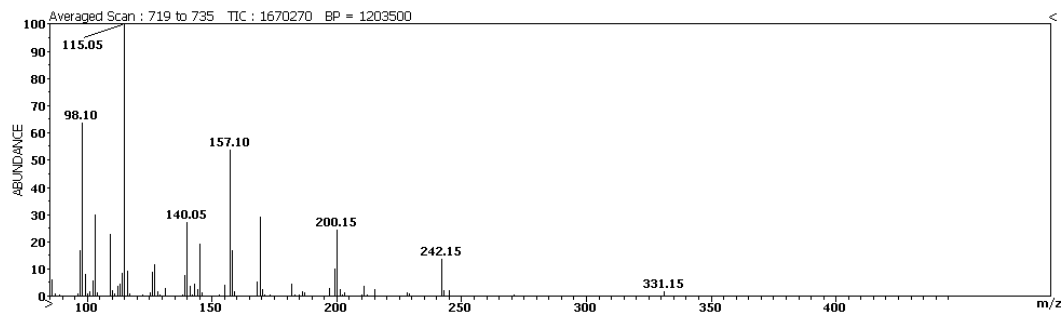

**Figure S-2a.** Electron impact mass spectrum of pentaacetate glucose

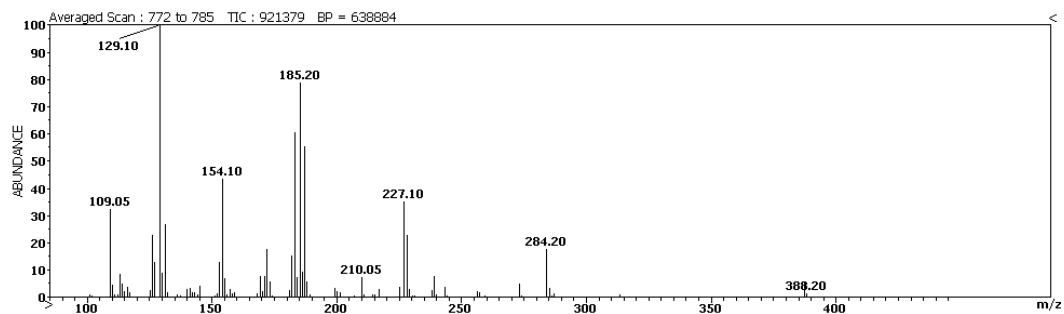

**Figure S-2b.** Electron impact mass spectrum of pentapropionate glucose

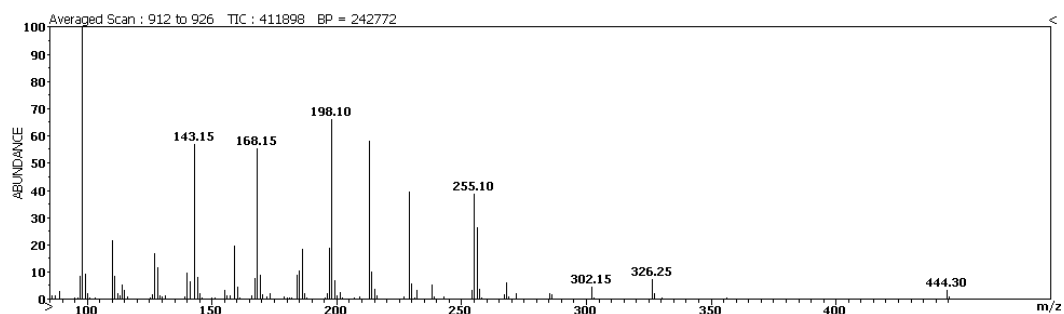

**Figure S-2c.** Electron impact mass spectrum of pentabutanoate glucose

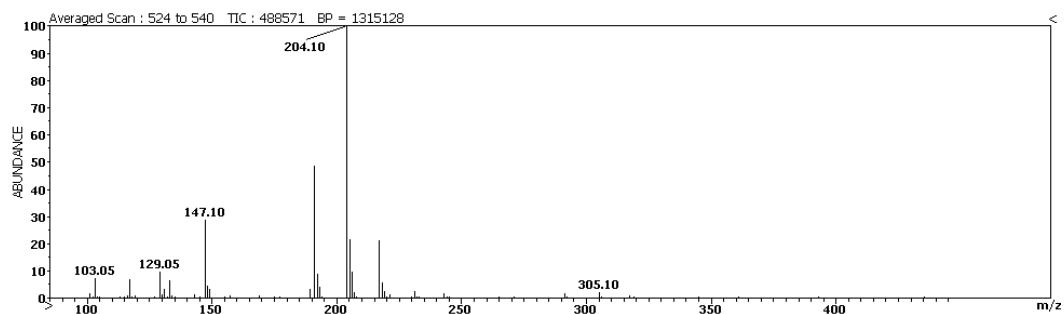

**Figure S-2d.** Electron impact mass spectrum of pentatrimethylsilyl glucose

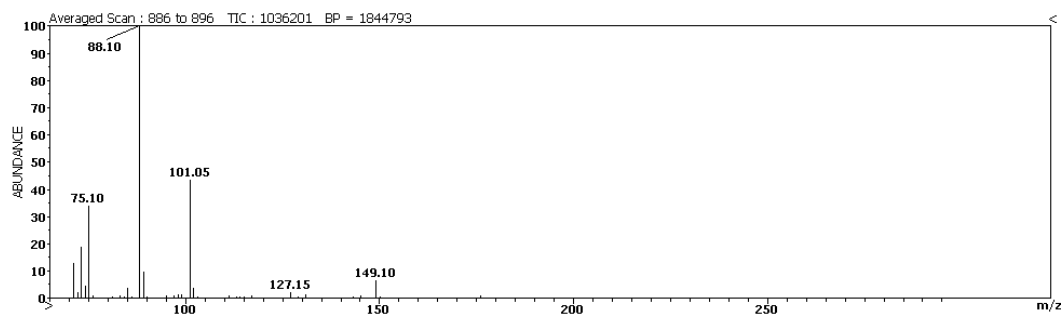

**Figure S-2e.** Electron impact mass spectrum of permethyl glucose

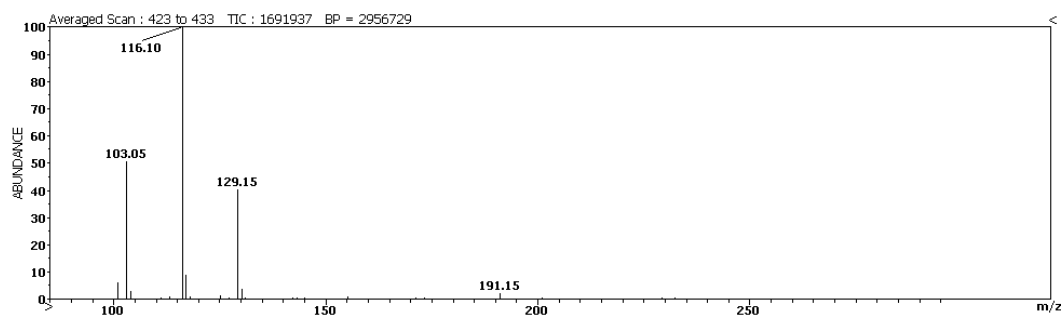

**Figure S-2f.** Electron impact mass spectrum of perethyl glucose

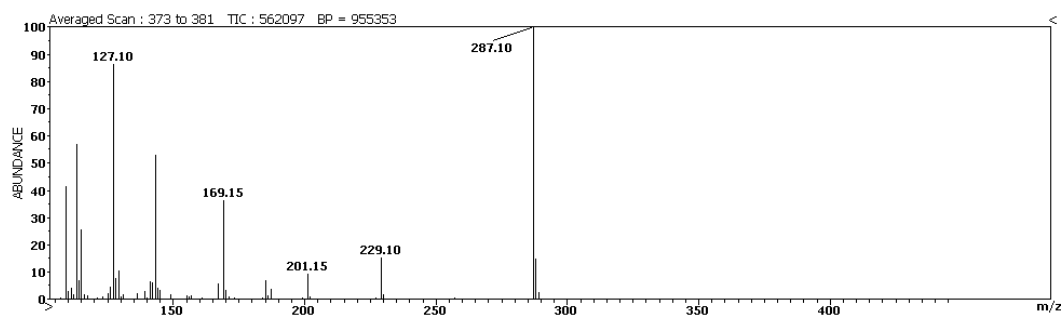

**Figure S-2g.** Electron impact mass spectrum of di-O-isopropylidene acetate glucose

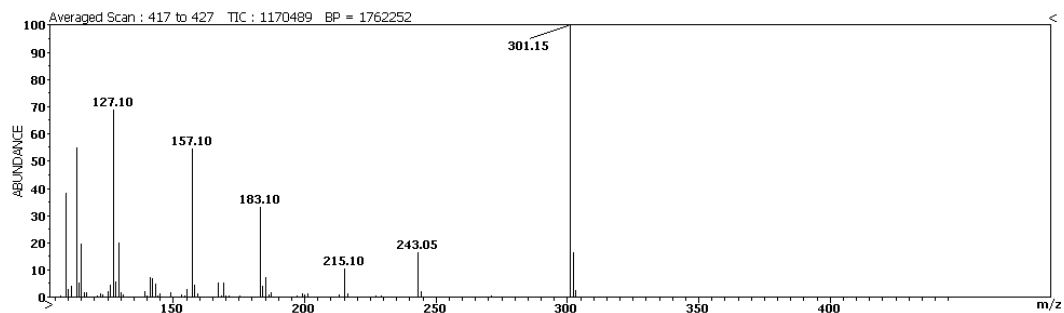

**Figure S-2h.** Electron impact mass spectrum of di-O-isopropylidene propionate glucose

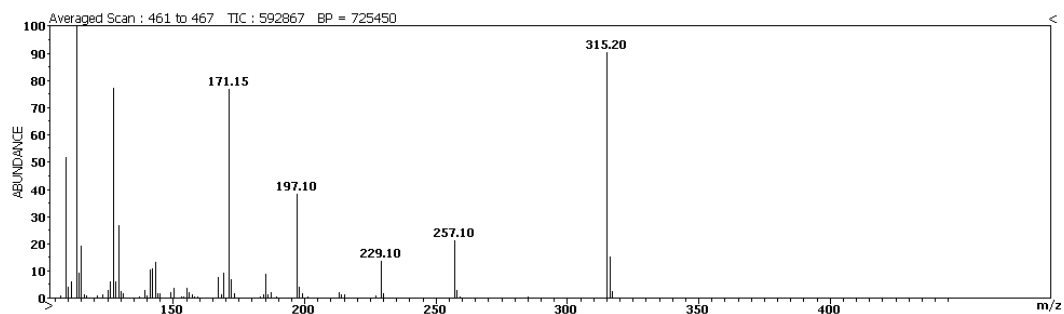

**Figure S-2i.** Electron impact mass spectrum of di-O-isopropylidene butanoate glucose

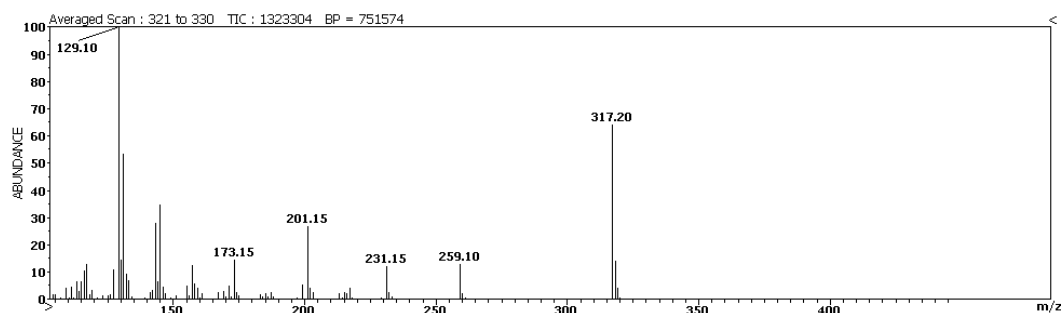

**Figure S-2j.** Electron impact mass spectrum of di-O-isopropylidene trimethylsilyl glucose

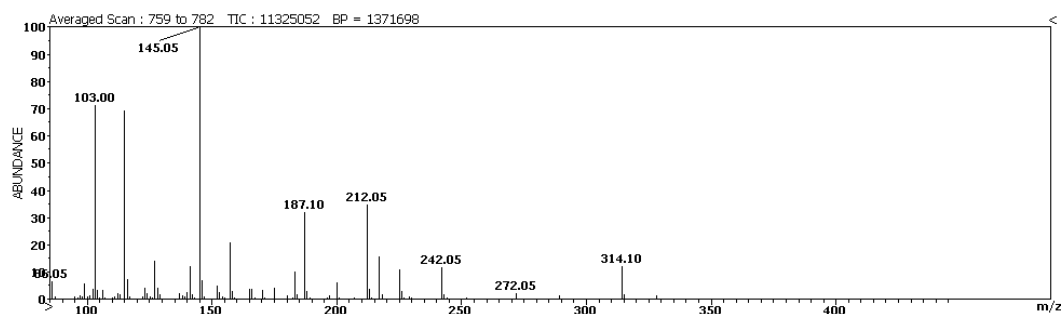

**Figure S-2k.** Electron impact mass spectrum of aldonitrile pentaacetate glucose

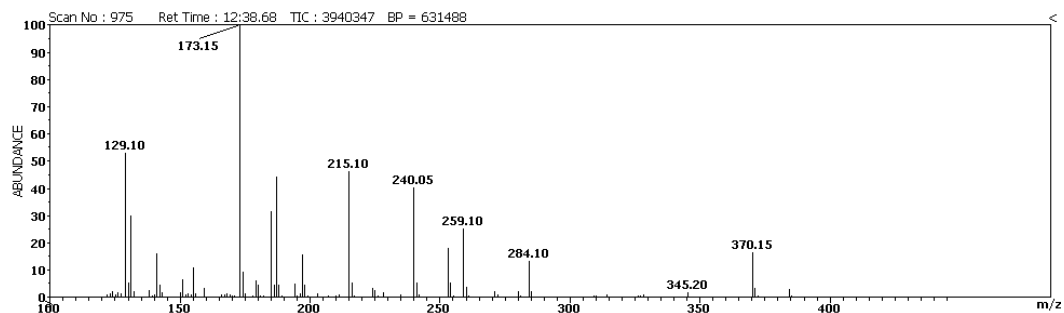

**Figure S-2l.** Electron impact mass spectrum of aldonitrile pentapropionate glucose

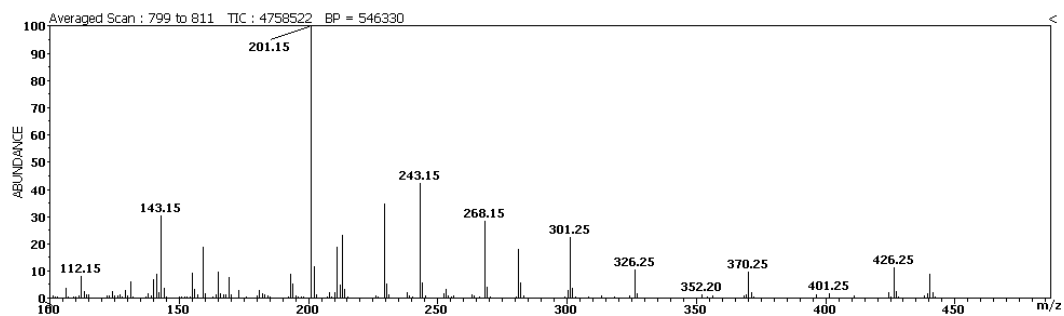

**Figure S-2m.** Electron impact mass spectrum of aldonitrile pentabutanoate glucose

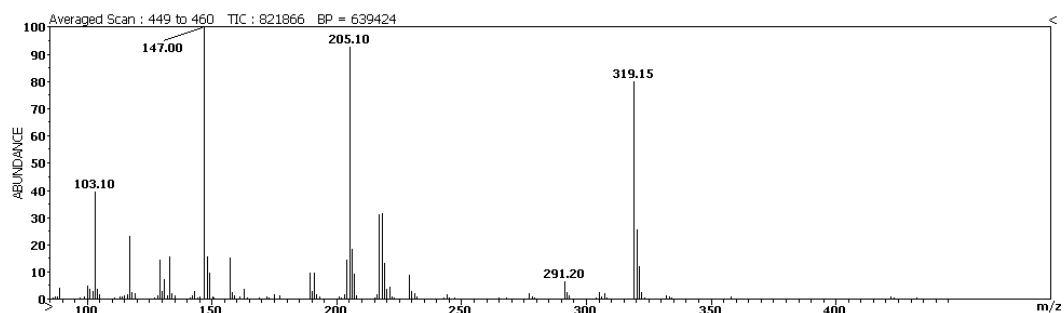

**Figure S-2n.** Electron impact mass spectrum of aldonitrile pentatrimethylsilyl glucose

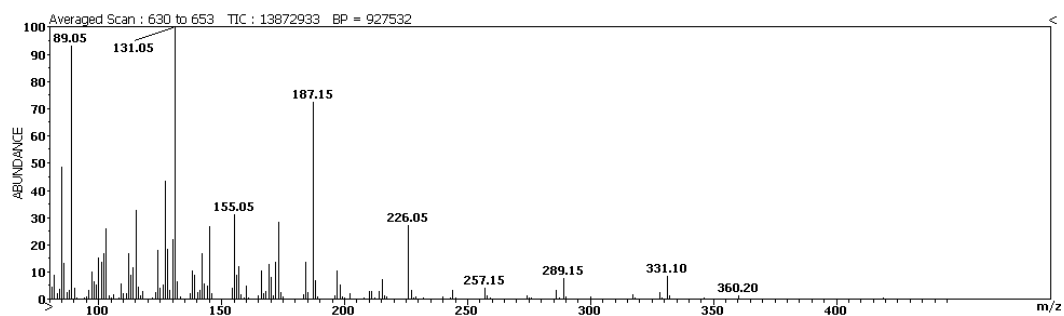

**Figure S-2o.** Electron impact mass spectrum of methyloxime pentacetate glucose

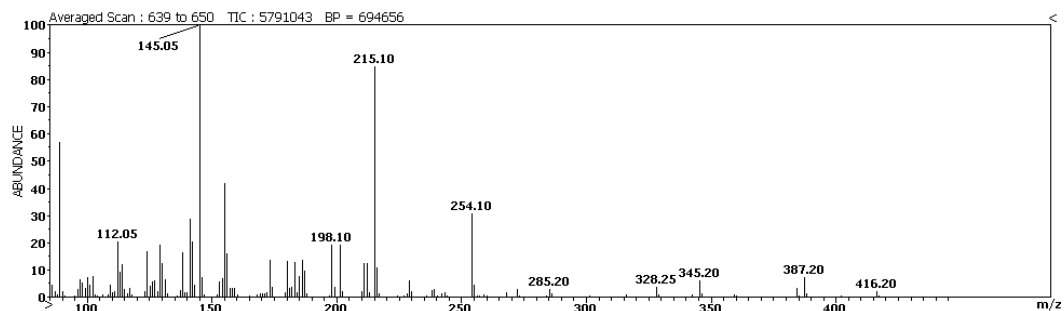

**Figure S-2p.** Electron impact mass spectrum of methyloxime pentapropionate glucose

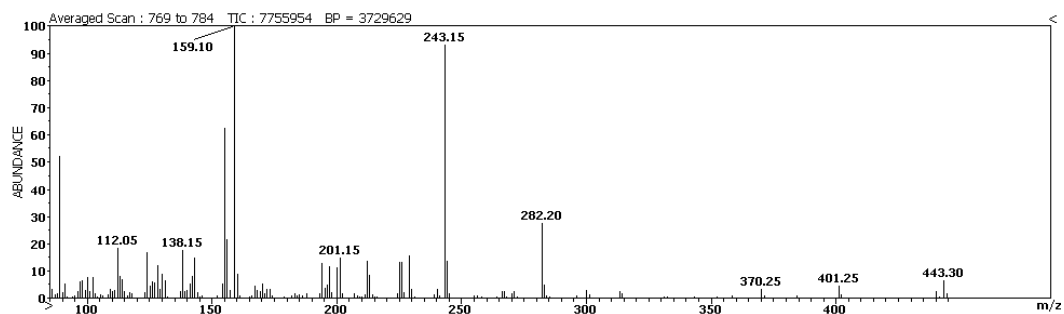

**Figure S-2q.** Electron impact mass spectrum of methyloxime pentabutanoate glucose

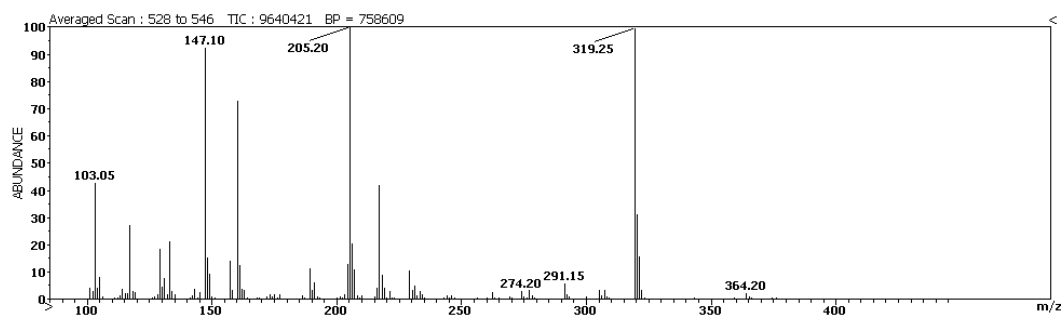

**Figure S-2r.** Electron impact mass spectrum of methyloxime pentatrimethylsilyl glucose

**Table S-3.** List of most abundant fragments for each glucose derivative that were evaluated.

| Glucose derivative                 | Most abundant fragments ( <i>m/z</i> )                                                   |
|------------------------------------|------------------------------------------------------------------------------------------|
| Pentaacetate                       | 98, 103, 109, 115, 140, 145, 157, 169, 200, 242, 331                                     |
| Pentapropionate                    | 109, 129, 131, 154, 183, 185, 187, 210, 227, 284, 387                                    |
| Pentabutanoate                     | 98, 110, 127, 143, 159, 168, 186, 198, 213, 229, 255, 302, 326, 444                      |
| Pentatrimethylsilyl                | 103, 117, 129, 133, 147, 191, 204, 217, 305                                              |
| Permethyl                          | 75, 88, 101, 149                                                                         |
| Perethyl                           | 103, 116, 129, 191                                                                       |
| Di-O-isopropylidene acetate        | 109, 113, 127, 143, 169, 185, 201, 229, 287                                              |
| Di-O-isopropylidene propionate     | 109, 113, 127, 157, 183, 215, 243, 301                                                   |
| Di-O-isopropylidene butanoate      | 109, 113, 127, 171, 197, 229, 257, 315                                                   |
| Di-O-isopropylidene trimethylsilyl | 129, 131, 143, 145, 173, 185, 201, 231, 259, 317                                         |
| Aldonitrile pentaacetate           | 103, 115, 127, 141, 145, 157, 187, 212, 217, 225, 242, 272, 314                          |
| Aldonitrile pentapropionate        | 129, 131, 141, 155, 173, 185, 187, 197, 215, 240, 253, 259, 284, 345, 370, 384           |
| Aldonitrile pentabutanoate         | 112, 143, 155, 159, 169, 193, 201, 211, 213, 229, 243, 268, 281, 301, 326, 370, 426, 440 |
| Aldonitrile pentatrimethylsilyl    | 103, 117, 129, 133, 147, 157, 189, 191, 205, 217, 229, 291, 319                          |
| Methyloxime pentaacetate           | 85, 89, 115, 127, 131, 145, 155, 173, 187, 197, 215, 226, 257, 286, 289, 331             |
| Methyloxime pentapropionate        | 89, 112, 141, 145, 155, 198, 201, 215, 254, 328, 345, 384, 387, 416                      |
| Methyloxime pentabutanoate         | 89, 112, 124, 138, 155, 159, 212, 229, 243, 282, 370, 401, 443                           |
| Methyloxime pentatrimethylsilyl    | 103, 117, 129, 133, 147, 160, 189, 205, 217, 229, 291, 319, 364                          |



**Table S-4.** Mass isotopomer distributions for deuterated glucose standards.

| <i>m/z</i>                      | M+0  | M+1  | M+2  | M+3 | M+4 |
|---------------------------------|------|------|------|-----|-----|
| <b>[1-<sup>2</sup>H]glucose</b> |      |      |      |     |     |
| 301                             | 0.0  | 82.1 | 15.1 | 2.5 | 0.3 |
| 145                             | 0.2  | 89.4 | 9.4  | 1.0 | 0.1 |
| 173                             | 90.6 | 8.2  | 1.1  | 0.1 | 0.0 |
| 259                             | 86.5 | 11.6 | 1.8  | 0.2 | 0.0 |
| 284                             | 82.7 | 14.9 | 2.2  | 0.2 | 0.1 |
| 370                             | 78.8 | 17.5 | 3.3  | 0.4 | 0.0 |
| <b>[2-<sup>2</sup>H]glucose</b> |      |      |      |     |     |
| 301                             | 0.0  | 83.1 | 14.3 | 2.4 | 0.2 |
| 145                             | 0.8  | 90.4 | 7.8  | 0.9 | 0.1 |
| 173                             | 90.5 | 8.3  | 1.1  | 0.1 | 0.0 |
| 259                             | 86.3 | 11.7 | 1.9  | 0.2 | 0.0 |
| 284                             | 0.8  | 84.6 | 12.6 | 1.9 | 0.2 |
| 370                             | 0.8  | 80.7 | 15.4 | 2.8 | 0.4 |
| <b>[3-<sup>2</sup>H]glucose</b> |      |      |      |     |     |
| 301                             | 1.3  | 81.3 | 14.7 | 2.4 | 0.3 |
| 145                             | 90.0 | 8.9  | 1.0  | 0.1 | 0.0 |
| 173                             | 90.5 | 8.3  | 1.1  | 0.1 | 0.0 |
| 259                             | 86.3 | 11.6 | 1.9  | 0.2 | 0.0 |
| 284                             | 1.1  | 83.3 | 13.3 | 2.0 | 0.2 |
| 370                             | 0.9  | 79.8 | 16.1 | 3.0 | 0.4 |
| <b>[4-<sup>2</sup>H]glucose</b> |      |      |      |     |     |
| 301                             | 4.1  | 80.8 | 12.7 | 2.1 | 0.2 |
| 145                             | 87.5 | 11.2 | 1.2  | 0.1 | 0.0 |
| 173                             | 90.4 | 8.3  | 1.1  | 0.1 | 0.0 |
| 259                             | 6.1  | 81.1 | 10.9 | 1.7 | 0.2 |
| 284                             | 5.1  | 80.9 | 12.0 | 1.8 | 0.2 |
| 370                             | 4.5  | 77.5 | 15.0 | 2.7 | 0.3 |

**Table S-4 (continued).** Mass isotopomer distributions of selected fragments for deuterated glucose standards.

| <i>m/z</i>                                    | M+0  | M+1  | M+2  | M+3  | M+4 |
|-----------------------------------------------|------|------|------|------|-----|
| <b>[5-<sup>2</sup>H]glucose</b>               |      |      |      |      |     |
| 301                                           | 0.0  | 84.1 | 13.4 | 2.2  | 0.2 |
| 145                                           | 91.3 | 7.7  | 1.0  | 0.1  | 0.0 |
| 173                                           | 0.0  | 90.6 | 8.3  | 1.1  | 0.1 |
| 259                                           | 0.0  | 86.4 | 11.6 | 1.8  | 0.2 |
| 284                                           | 85.0 | 12.9 | 1.9  | 0.2  | 0.0 |
| 370                                           | 0.0  | 81.0 | 15.7 | 2.9  | 0.4 |
| <b>[6,6-<sup>2</sup>H<sub>2</sub>]glucose</b> |      |      |      |      |     |
| 301                                           | 0.1  | 2.9  | 79.3 | 14.9 | 2.6 |
| 145                                           | 91.3 | 7.0  | 1.6  | 0.2  | 0.0 |
| 173                                           | 0.6  | 1.5  | 86.2 | 10.4 | 1.3 |
| 259                                           | 0.3  | 2.3  | 81.8 | 13.5 | 2.2 |
| 284                                           | 84.8 | 12.8 | 2.2  | 0.2  | 0.0 |
| 370                                           | 78.6 | 17.5 | 3.3  | 0.4  | 0.2 |

**Table S-5.** Mass isotopomer distributions for mixtures of [2-<sup>2</sup>H]-, [5-<sup>2</sup>H]glucose and natural glucose.

| <i>m/z</i>                                                                           | M+0  | M+1  | M+2  | M+3 | M+4 |
|--------------------------------------------------------------------------------------|------|------|------|-----|-----|
| <hr/>                                                                                |      |      |      |     |     |
| [2- <sup>2</sup> H]glucose + [5- <sup>2</sup> H]glucose (50:50)                      |      |      |      |     |     |
| 301                                                                                  | 0.0  | 83.1 | 14.3 | 2.4 | 0.3 |
| 145                                                                                  | 46.6 | 48.7 | 4.2  | 0.5 | 0.0 |
| 173                                                                                  | 44.5 | 50.1 | 4.8  | 0.6 | 0.0 |
| 259                                                                                  | 42.3 | 49.8 | 6.9  | 1.0 | 0.1 |
| 284                                                                                  | 44.1 | 47.8 | 7.1  | 1.0 | 0.1 |
| 370                                                                                  | 0.1  | 81.0 | 15.7 | 2.9 | 0.3 |
| <hr/>                                                                                |      |      |      |     |     |
| [2- <sup>2</sup> H]glucose + [5- <sup>2</sup> H]glucose + natural glucose (10:10:80) |      |      |      |     |     |
| 301                                                                                  | 68.4 | 26.7 | 4.3  | 0.6 | 0.0 |
| 145                                                                                  | 83.3 | 15.1 | 1.4  | 0.1 | 0.0 |
| 173                                                                                  | 81.3 | 16.7 | 1.9  | 0.2 | 0.0 |
| 259                                                                                  | 77.4 | 19.4 | 2.8  | 0.3 | 0.0 |
| 284                                                                                  | 77.0 | 19.5 | 2.9  | 0.4 | 0.1 |
| 370                                                                                  | 65.4 | 28.4 | 5.3  | 0.8 | 0.1 |
| <hr/>                                                                                |      |      |      |     |     |
| [2- <sup>2</sup> H]glucose + [5- <sup>2</sup> H]glucose + natural glucose (5:5:90)   |      |      |      |     |     |
| 301                                                                                  | 76.0 | 20.2 | 3.3  | 0.4 | 0.0 |
| 145                                                                                  | 87.6 | 11.2 | 1.1  | 0.1 | 0.0 |
| 173                                                                                  | 85.7 | 12.6 | 1.5  | 0.1 | 0.0 |
| 259                                                                                  | 81.9 | 15.6 | 2.3  | 0.3 | 0.0 |
| 284                                                                                  | 80.8 | 16.1 | 2.5  | 0.4 | 0.2 |
| 370                                                                                  | 72.9 | 22.3 | 4.1  | 0.6 | 0.1 |
| <hr/>                                                                                |      |      |      |     |     |
| [2- <sup>2</sup> H]glucose + [5- <sup>2</sup> H]glucose + natural glucose (1:1:98)   |      |      |      |     |     |
| 301                                                                                  | 82.4 | 14.9 | 2.5  | 0.3 | 0.0 |
| 145                                                                                  | 91.5 | 7.7  | 0.7  | 0.1 | 0.0 |
| 173                                                                                  | 89.6 | 9.1  | 1.2  | 0.1 | 0.0 |
| 259                                                                                  | 85.2 | 12.7 | 2.0  | 0.2 | 0.0 |
| 284                                                                                  | 84.2 | 13.3 | 2.2  | 0.2 | 0.1 |
| 370                                                                                  | 79.2 | 17.2 | 3.2  | 0.4 | 0.0 |

### S-6. Calculation of positional deuterium enrichments using least-squares regression.

The amount of deuterium at each carbon position of glucose was determined by least-squares regression. First, theoretical MIDs were calculated for the six selected glucose fragments and all isotopomers of glucose. With seven stable (i.e. carbon bound) hydrogen atoms, there are 128 ( $=2^7$ ) possible isotopomers of glucose hydrogen atoms. The MID of a fragment of glucose can be viewed as a linear combination of theoretical MIDs of each isotopomer of glucose, with isotopomer fractions ( $x$ ) as the coefficients:

$$MID = x_{0000000} \times MID_{0000000}^{theor.} + x_{0000001} \times MID_{0000001}^{theor.} + \dots + x_{1111111} \times MID_{1111111}^{theor.} \quad (1)$$

The above equation can be written in matrix form:

$$MID = [MID_{0000000}^{theor.} \quad MID_{0000001}^{theor.} \quad \dots \quad MID_{1111111}^{theor.}] \times x \quad (2)$$

With six glucose fragments, we have six of such equations, which can be written in a matrix form:

$$\begin{bmatrix} MID_{frag. 1} \\ MID_{frag. 2} \\ \dots \\ MID_{frag. 6} \end{bmatrix} = \begin{bmatrix} MID_{0000000}^{theor. frag. 1} & MID_{0000001}^{theor. frag. 1} & \dots & MID_{1111111}^{theor. frag. 1} \\ MID_{0000000}^{theor. frag. 2} & MID_{0000001}^{theor. frag. 2} & \dots & MID_{1111111}^{theor. frag. 2} \\ \dots & \dots & \dots & \dots \\ MID_{0000000}^{theor. frag. 6} & MID_{0000001}^{theor. frag. 6} & \dots & MID_{1111111}^{theor. frag. 6} \end{bmatrix} \times x \quad (3)$$

Or, in short notation:

$$MID_s = MID_s^{theor.} \times x \quad (4)$$

Isotopomer fractions ( $x$ ) were estimated by solving the following regression problem using Matlab (Mathworks Inc.):

$$\begin{aligned} \min \sum (\text{MIDs} - \text{MIDs}^{\text{measured}})^2 & \quad (5) \\ \text{s.t. } \text{MIDs} = \text{MIDs}^{\text{theoretical}} \times x & \\ 0 \leq x_i \leq 1, \sum x_i = 1 & \end{aligned}$$

The deuterium enrichments of glucose hydrogen atoms were then determined by summation of appropriate isotopomer fractions, where  $N$  is a  $6 \times 128$  matrix:

$$[ D_1, D_2, D_3, D_4, D_5, D_{66} ] = N \times x \quad (6)$$

We denote the deuterium enrichment at C1 of glucose as  $D_1$ , the enrichment at C2 as  $D_2$ , etc. Since there are two hydrogen atoms at C6 that cannot be distinguished by GC-MS we determined the average enrichment at  $C_6$  as  $D_{66}/2$ .

### ***Calculation of theoretical mass isotopomer distributions***

The theoretical MIDs for each glucose fragment and all isotopomers of glucose in Eq. (3) were calculated using the elementary metabolite unit (EMU) methodology (Antoniewicz et al, Metab Eng 9(1): 68-86, 2007). For calculating theoretical MID the following natural isotope abundances were used:  $^2\text{H}$  (0.0156 At%),  $^{13}\text{C}$  (1.082 At%),  $^{15}\text{N}$  (0.366 At%),  $^{17}\text{O}$  (0.038 At%),  $^{18}\text{O}$  (0.204 At%),  $^{29}\text{Si}$  (4.69 At%),  $^{30}\text{Si}$  (3.09 At%).
